# Supplementary material for: Development and assessment of a website presenting evidence-based information for people with multiple sclerosis: the IN-DEEP project
Source: Springer Nature journal article supplement (doi:10.1186/s12883-016-0552-0), 2016-03-02
Supplement: MOESM1 [file 9742798]

## Appendix 1. Questionnaire

1. How did you know the IN-DEEP website?

- from another website
- an invitation by e-mail
- from Facebook
- suggestion by relative or friend
- other, please specify.....

2. Female  Male

3. Age

4. What is your home postcode? \_\_\_\_\_

5. Tick at least one: You are....

- A person with MS

When have you been diagnosed with MS? \_\_\_\_\_(year)

Which type of MS do you have?

Relapsing remitting MS

Secondary progressive MS

Primary progressive MS

Progressive relapsing MS

Don't know

- A family member of a person with MS

When has your family member been diagnosed with MS? \_\_\_\_\_(year)

Which type of MS does your family member have?

Relapsing remitting MS

Secondary progressive MS

Primary progressive MS

Progressive relapsing MS

Don't know

- None of the options above

6. What is the highest level of education you have attended? (Tick one only)

- Primary school diploma
- Middle school diploma
- Senior high school
- University
- No diploma

7. What is your occupation? (Tick one only)

- Employed
- Unemployed looking for work student
- Homemaker
- Retired

8. How often would you usually use a computer for Internet activities (both at home and at work)?

- Less than once a month
- Some times a month
- At least once a week
- Most days of the week
- Every day

In general, the information reported on the IN-DEEP website is

|                        | Not at all | A little bit | Somewhat | Really/extremely |
|------------------------|------------|--------------|----------|------------------|
| 9. Easy to read        |            |              |          |                  |
| 10. Easy to understand |            |              |          |                  |
| 11. Useful             |            |              |          |                  |
| 12. Reliable           |            |              |          |                  |

Please, tell us why...

|                                                                                                         | Not at all | A little bit | Somewhat | Really/extremely |
|---------------------------------------------------------------------------------------------------------|------------|--------------|----------|------------------|
| 13. Is the information in the sections “A question of method” and “Glossary” useful?                    |            |              |          |                  |
| 14. The three-level reporting (“in brief”, “in details”, “more”) makes the information easy to be read? |            |              |          |                  |
| 15. Do you think the three levels should be maintained?                                                 |            |              |          |                  |
| 16. Is the IN-DEEP website easy to navigate?                                                            |            |              |          |                  |

17. Would you suggest IN-DEEP to other people with MS or families?

Yes No Don't know

Please give us your comments

**If you are a person with MS or a family member, please go on and fill the 10 questions below.**

Section “In detail“

|                                                                 | Not at all | A little bit | Somewhat | Really/extremely |
|-----------------------------------------------------------------|------------|--------------|----------|------------------|
| 19. Is the information on the benefits of IFN clear?            |            |              |          |                  |
| 20. Is the graphical presentation of the benefits of IFN clear? |            |              |          |                  |
| 21. Is the information on harms of IFN clear?                   |            |              |          |                  |
| 22. Is the table reporting the harms of IFN clear?              |            |              |          |                  |

|                                                |  |  |  |  |
|------------------------------------------------|--|--|--|--|
| 23. Is the information in this section useful? |  |  |  |  |
|------------------------------------------------|--|--|--|--|

Section “More”

|                                                | Not at all | A little bit | Somewhat | Really/extremely |
|------------------------------------------------|------------|--------------|----------|------------------|
| 24. Is the information in this section clear?  |            |              |          |                  |
| 25. Is the information in this section useful? |            |              |          |                  |

In general

|                                                                                       | Not at all | A little bit | Somewhat | Really/extremely |
|---------------------------------------------------------------------------------------|------------|--------------|----------|------------------|
| 26. Does the information in the IN-DEEP website responded to your information needs?  |            |              |          |                  |
| 27. Is the information on benefits and harms of IFN useful?                           |            |              |          |                  |
| 28. Do you feel more confident in making decisions about IFN?                         |            |              |          |                  |
| 29. Would you use the information in the IN-DEEP website to make decisions about IFN? |            |              |          |                  |

Please give us your comments
